# Supplementary material
Source: HighWire-hosted journal article supplement (https://www.annfammed.org/highwire/filestream/613/field_highwire_adjunct_files/0/Khanna_Supp_Fig.pdf)
Supplement: Khanna_Supp_Fig.pdf [file Khanna_Supp_Fig.pdf]

**Supplemental materials for:**

Khanna N, Gritzer L, Klyushnenkova E, et al. Practice transformation analytics dashboard for clinician engagement. *Ann Fam Med.* 2019;17(Suppl\_1):S73-S76.

**Supplemental Figure 1 – Maps of Primary and Specialty Care Practices**

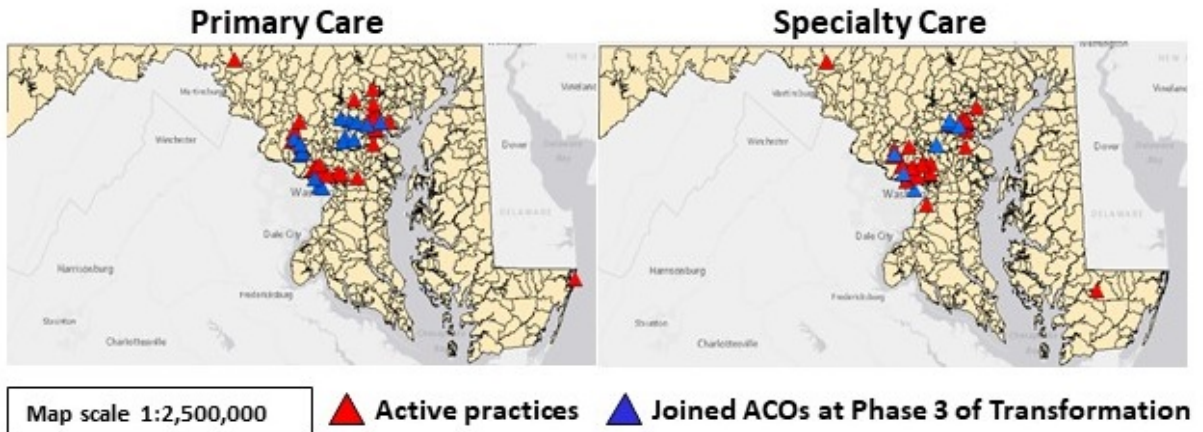

**Figure 2- Example Practice Transformation Analytics Dashboard**

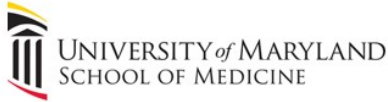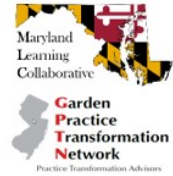

Practice: Jane Doe, MD  
 Tax Identification Number: 123456789  
 Enrollment Date: 12/12/16

| Quality and Resource Use Report (QRUR) 2016 | Total Beneficiaries | Cost     | National Benchmark |
|---------------------------------------------|---------------------|----------|--------------------|
| Practice Total                              | 381                 | \$10,518 | \$12,380           |
| Diabetes                                    | 163                 | \$15,583 | \$18,420           |
| *COPD                                       | 33                  | \$25,358 | \$29,613           |
| *IHD                                        | 34                  | \$24,524 | \$22,117           |
| *CHF                                        | 34                  | \$29,641 | \$33,953           |
| Readmissions Rate                           | 58                  | 15.36%   | 15.29%             |

\*Chronic Obstructive Pulmonary Disease, Ischemic Heart Disease, Congestive Heart Failure

|                                          |     |                                     |     |
|------------------------------------------|-----|-------------------------------------|-----|
| Total Cost Difference 2015 to 2016 QRUR: |     | -\$99.86                            |     |
| 2016 QRUR Average Risk Score             |     | 69 <sup>th</sup> Percentile         |     |
| Current Phase in Practice Transformation |     | Phase 4                             |     |
| CRISP Connectivity                       |     | Yes                                 |     |
| <b>Patient and Family Engagement</b>     |     |                                     |     |
| Active e-tool                            | NO  | Health Literacy Survey              | NO  |
| Shared Decision-Making                   | YES | Support for Patient & Family Voices | YES |
| Patient Activation                       | NO  | Medication Management               | YES |

**Key Performance Indicators- EHR: SMART EHR**

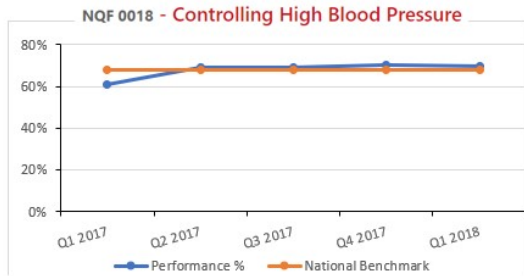

**Practice Transformation Progress**

| SUMMARY                                           | #         | Ct        | Pct         |
|---------------------------------------------------|-----------|-----------|-------------|
| Counts of Concepts Complete (Counting the Colors) |           |           |             |
| Phase 1 =                                         | 1         | 1         | 100 %       |
| Phase 2 =                                         | 12        | 12        | 100 %       |
| Phase 3 =                                         | 13        | 13        | 100 %       |
| Phase 4 =                                         | 16        | 13        | 81 %        |
| Phase 5 =                                         | 2         | 0         | 0 %         |
| <b>Total</b>                                      | <b>44</b> | <b>39</b> | <b>89 %</b> |
